# Supplementary material
Source: Springer Nature journal article supplement (https://www.springermedizin.de/resource/supplementary/40164_2013_77_MOESM2_ESM.pdf/9687194)

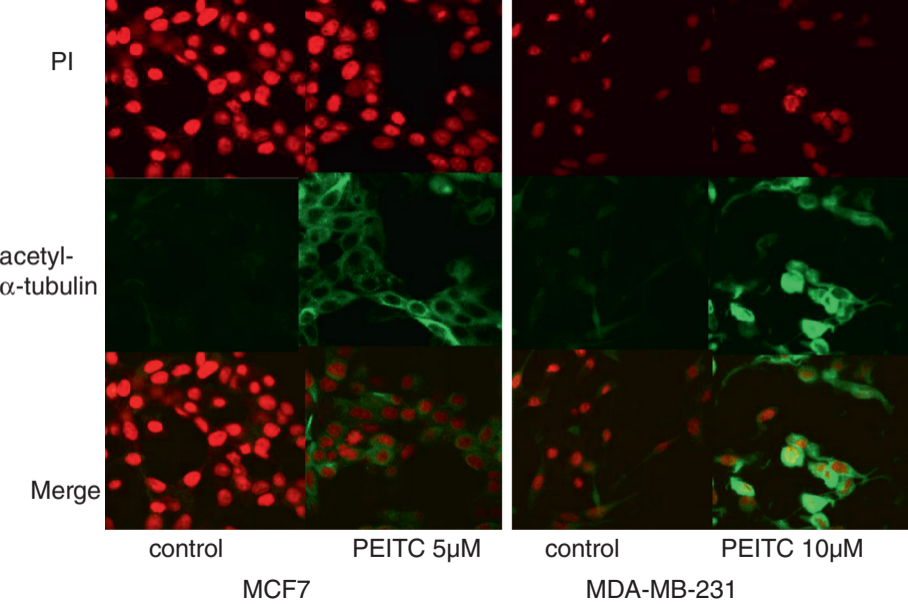

Supplement: MOESM2 [file 9687194]
